# Supplementary material
Source: publisher figshare collection journal article supplement (https://tandf.figshare.com/articles/dataset/_/7618601)
Supplement: Supplementary file 1 [file 2]

Archive with 2 entries (2 files):
- taos_a_1569454_sm5191.mov
- taos_a_1569454_sm0737.pdf
