# Supplementary material
Source: publisher figshare collection journal article supplement (https://tandf.figshare.com/articles/dataset/_/7618601)
Supplement: Supplementary file 1 [file 2 › taos_a_1569454_sm0737.pdf]

## **Supplementary Materials**

### **Ocean mesoscale structure-induced air-sea interaction in a high-resolution coupled model**

LIN Pengfei <sup>a,b</sup>, LIU Hailong <sup>a,b</sup>, MA Jing <sup>c</sup> and LI Yiwen <sup>a,b</sup>

<sup>a</sup>State Key Laboratory of Numerical Modeling for Atmospheric Sciences and Geophysical

Fluid Dynamics, Institute of Atmospheric Physics, Chinese Academy of Sciences, Beijing

100029, China; <sup>b</sup>University of Chinese Academy of Sciences, Beijing 100049, China; <sup>c</sup>Key

Laboratory of Meteorological Disaster of Ministry of Education, Nanjing University of

Information Science and Technology, Nanjing 210044, China

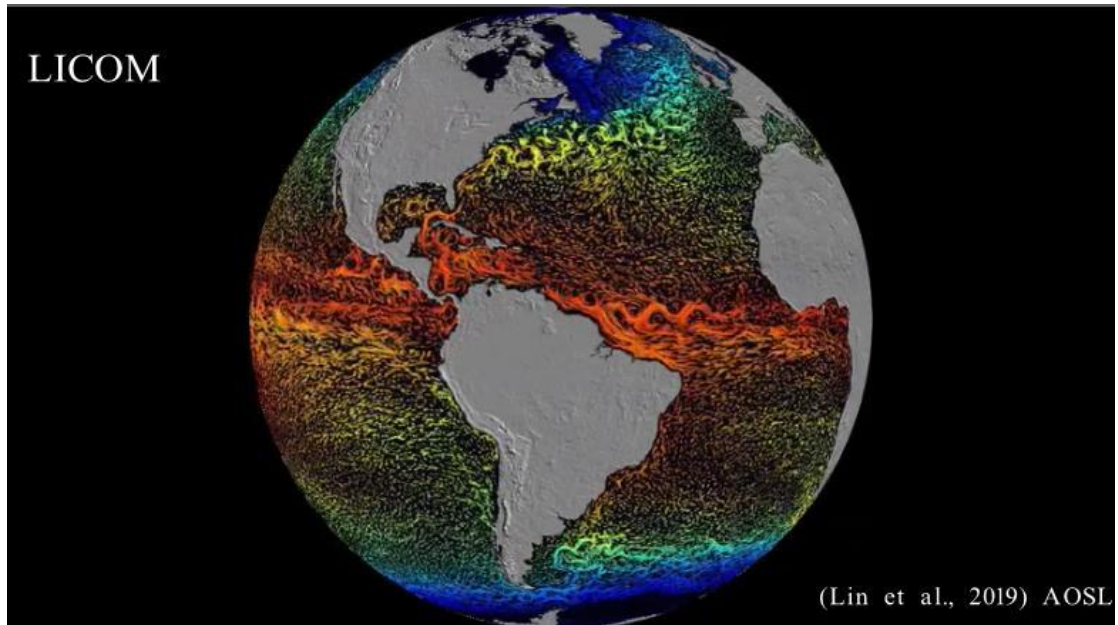

**Video 1** sea surface temperature (color) and sea surface current (vectors) in the high-resolution LICOM. (see the video attachment uploaded in the S1M)

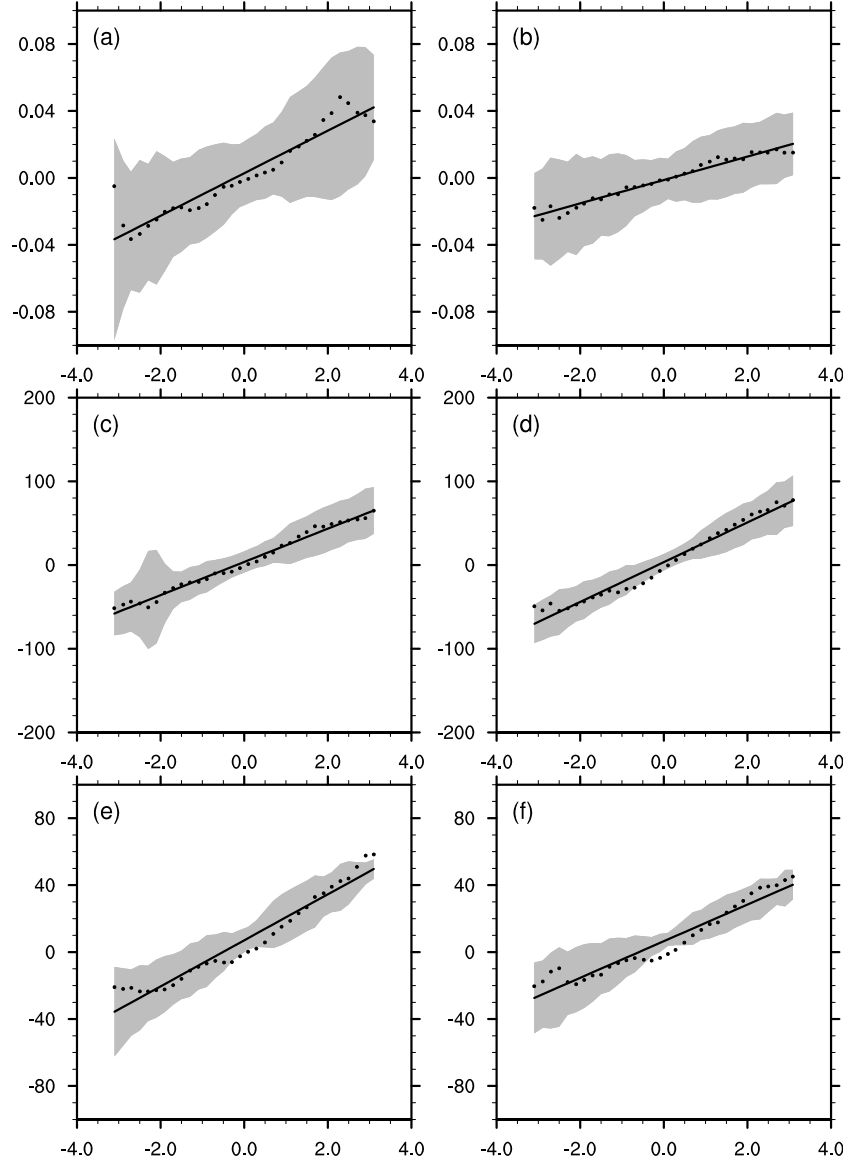

**Figure S1.** Binned scatterplots of high-pass filtered SST (units:  $^{\circ}\text{C}$ ) and wind stress magnitudes (units:  $\text{N m}^{-2}$ , a, b), SST and latent heat flux (units:  $\text{W m}^{-2}$ , c, d), SST and sensible heat flux (units:  $\text{W m}^{-2}$ , e, f) in the winter (DJF, December-January-February) according to observational (a, c, e) and high-resolution coupled simulation (b, d, f) results for over the Kuroshio and its extension. High-pass filtered wind stress magnitudes and associated standard deviations (STDs) are calculated for each 0.2  $^{\circ}\text{C}$  SST interval. Coupling coefficients are estimated as linear regression slopes (black lines) of wind stress magnitude, latent heat

flux, and sensible heat flux values bin averaged on SSTs (black dots); the gray shaded areas show  $\pm 1$  STD of wind stress magnitude, latent heat flux, and sensible heat flux perturbation for each SST bin.

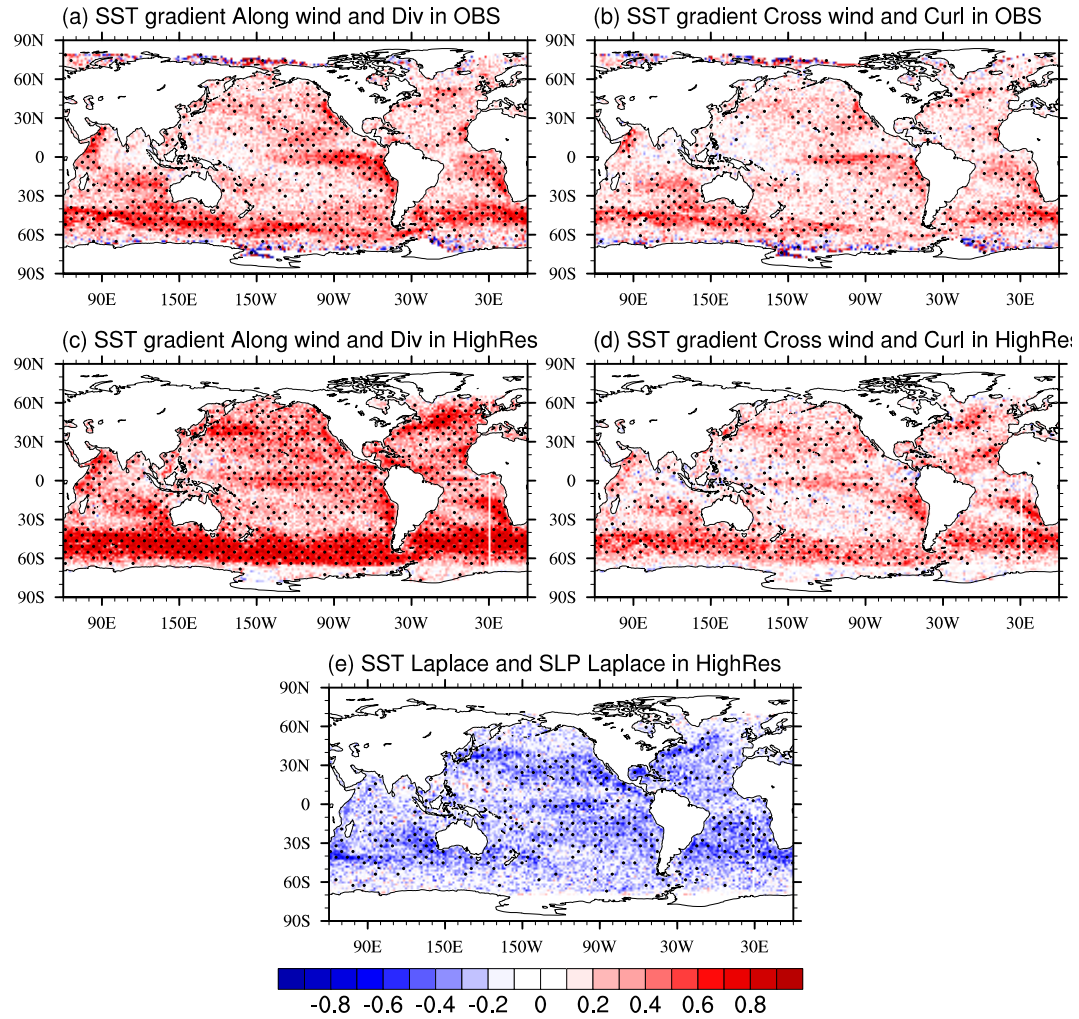

**Figure S2.** Correlation coefficients between high-pass filtered SST gradients along wind stress and wind stress divergence (a, b); between high-pass filtered SST gradients across wind stress and wind stress curl (c, d); between the Laplacian of SST and the Laplacian of SLP (e). Panels (a, b) are for the observations and (c, d, e) are for the high-resolution coupled model results. The area with dots passes student- $t$  tests at the 95% confidence level.
